# Supplementary material
Source: PubMed Central journal article supplement (PMC4248957)
Supplement: JVI.02166-14_zjv999099781so1.pdf [file JVI.02166-14_zjv999099781so1.pdf]

1 Supplemental Figures and Figure Legends

2 Figure S1

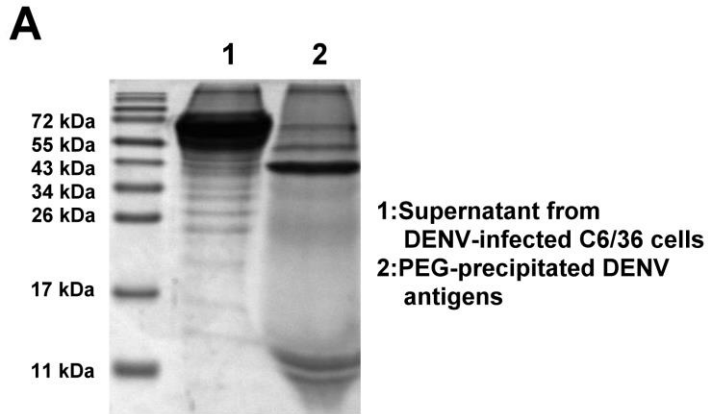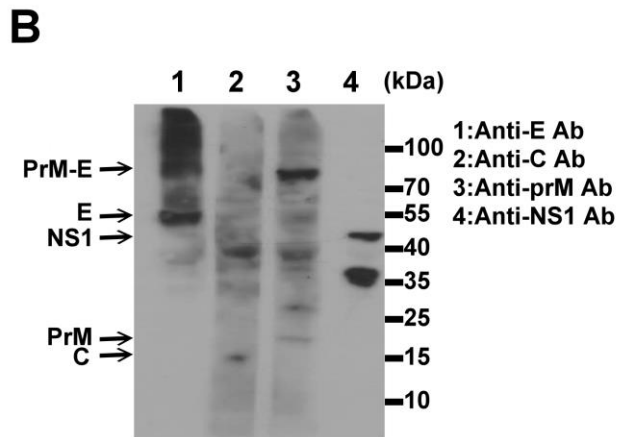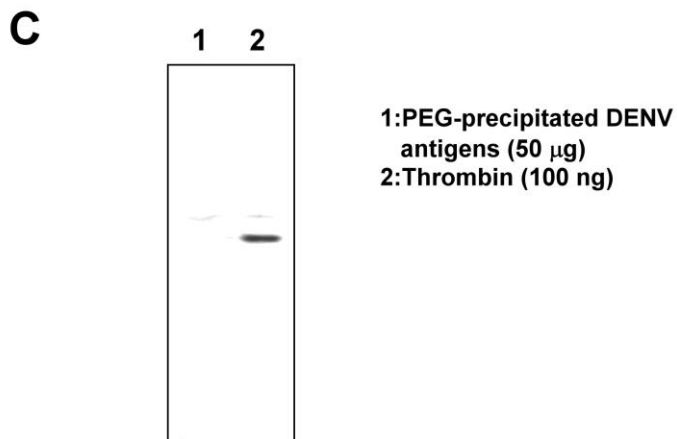

3

4 **Figure S1. Characterization of PEG-precipitated DENV antigens. (A)**

5 Supernatants from DENV-infected C6/36 cells and PEG-precipitated DENV antigens

6 were analyzed by SDS-PAGE. Lane 1: Supernatant from DENV-infected C6/36 cells;

7 Lane 2: PEG-precipitated DENV antigens (B) PEG-precipitated DENV antigens were  
8 detected by Western blotting using anti-E (lane 1), anti-C (lane 2), anti-PrM (lane 3),  
9 and anti-NS1 (lane 4) antibodies. (C) PEG-precipitated DENV antigens (50 µg, lane 1)  
10 were detected by Western blotting using anti-thrombin antibodies. Thrombin (lane 2)  
11 were used as positive control.
